# Supplementary material for: Travel Pattern and Prescription Analysis at a Single Travel Clinic Specialized for Yellow Fever Vaccination in South Korea
Source: PubMed Central journal article supplement — Infect Chemother. 2016 Mar 31;48(1):20–30. doi: 10.3947/ic.2016.48.1.20 (PMC4835431; doi:10.3947/ic.2016.48.1.20), 2016-03-31
Supplement: ic-48-20-s001.pdf [file ic-48-20-s001.pdf]

**Supplement 1.** Countries with high or moderate relative risk of malaria infection nationwide during travelling<sup>a</sup>

| High risk countries      | Moderate risk countries           |
|--------------------------|-----------------------------------|
| Benin                    | Angola                            |
| Cameroon                 | Burundi                           |
| Central African Republic | Congo, Democratic Republic of the |
| Chad                     | Gabon                             |
| Congo, Republic of the   | Madagascar                        |
| Côte d'Ivoire            | Malawi                            |
| Equatorial Guinea        | Mozambique                        |
| Gambia, The              | Rwanda                            |
| Ghana                    | Vanuatu                           |
| Guinea                   | Zambia                            |
| Haiti                    | Zimbabwe                          |
| Liberia                  |                                   |
| Mali                     |                                   |
| Niger                    |                                   |
| Nigeria                  |                                   |
| Senegal                  |                                   |
| Sierra Leone             |                                   |
| Solomon Islands          |                                   |
| Somalia                  |                                   |
| South Sudan, Republic of |                                   |
| Sudan                    |                                   |
| Togo                     |                                   |
| Uganda                   |                                   |

<sup>a</sup>Relative risk of malaria infection information was obtained from Center for Disease Control and Prevention ([http://www.cdc.gov/malaria/travelers/country\\_table/a.html](http://www.cdc.gov/malaria/travelers/country_table/a.html), accessed in October 2014.). Countries with localized malaria epidemic were excluded (Three countries in high risk and eleven countries in moderate risk).
